# Supplementary material
Source: publisher site journal article supplement (https://www.dovepress.com/article/290867)
Supplement: Supplementary file 1 [file get_supplementary_file.php]

**Supplementary Material**

**
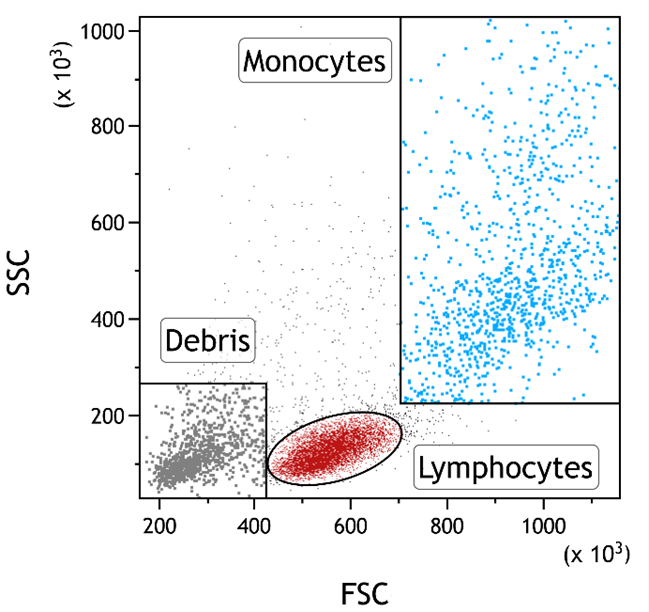
**

**Figure S1 Gating strategy for subsequent analysis on peripheral blood mononuclear cells (PBMCs).** Flow cytometry dot plot FSC vs. SSC presenting gating strategy for PBMCs to evaluate NTB700 effect on lymphocyte (red) and monocyte (light blue) populations.
